# Supplementary material
Source: PubMed Central journal article supplement (PMC5494841)

**a**

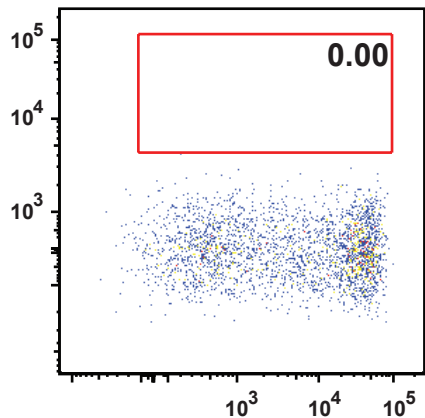

**CD16 Pacific Blue**

**b**

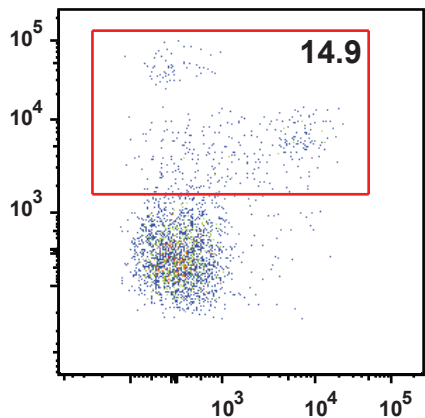

**CD56 PerCP-Cy5.5**

**c**

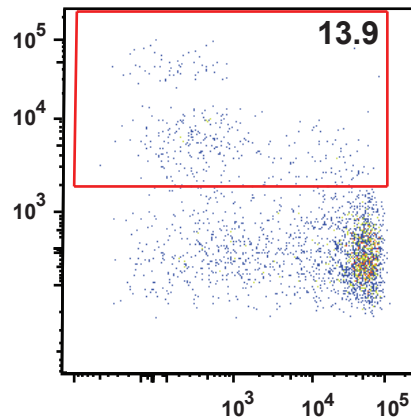

**CD16 Pacific Blue**

Supplement: NIHMS866639-supplement-SFigure_1.pdf [file NIHMS866639-supplement-SFigure_1.pdf]

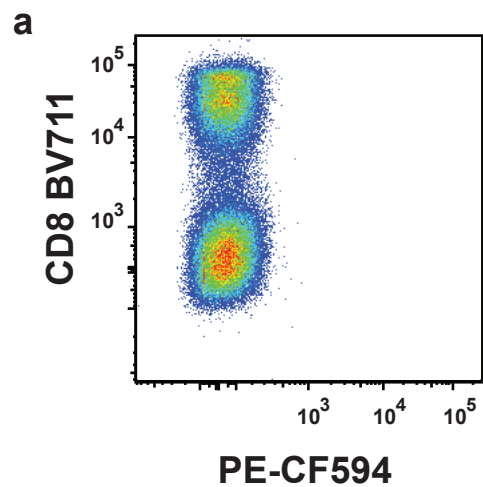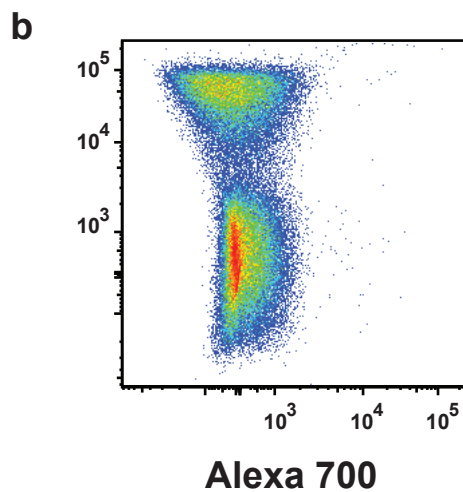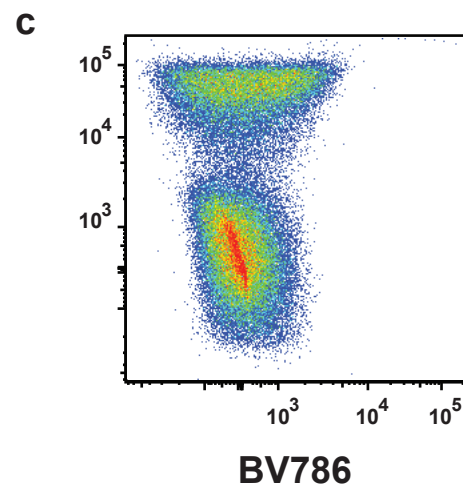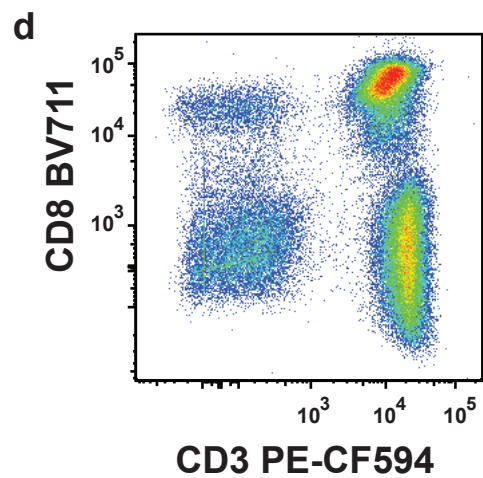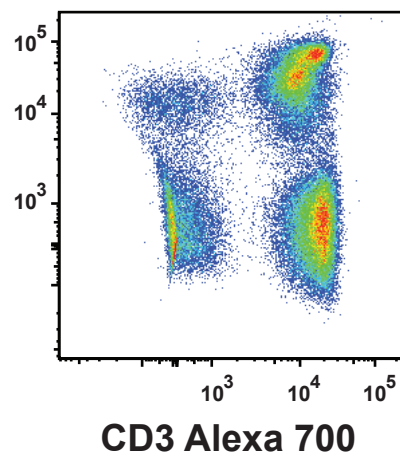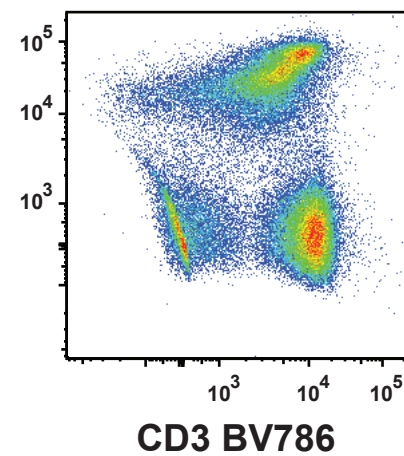

Supplement: NIHMS866639-supplement-SFigure_2.pdf [file NIHMS866639-supplement-SFigure_2.pdf]

**CD20 PE-CF594 a**

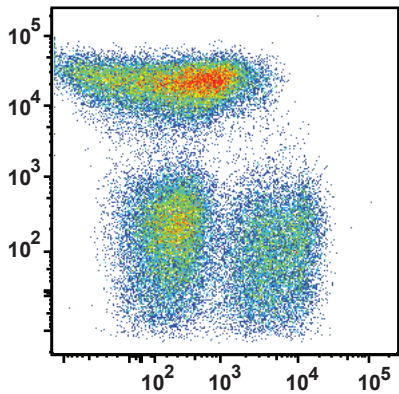

**CD8 BV711**

**b**

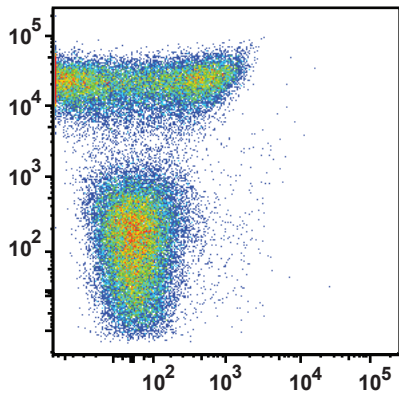

**CD56 PerCP-Cy5.5**

Supplement: NIHMS866639-supplement-SFigure_3.pdf [file NIHMS866639-supplement-SFigure_3.pdf]

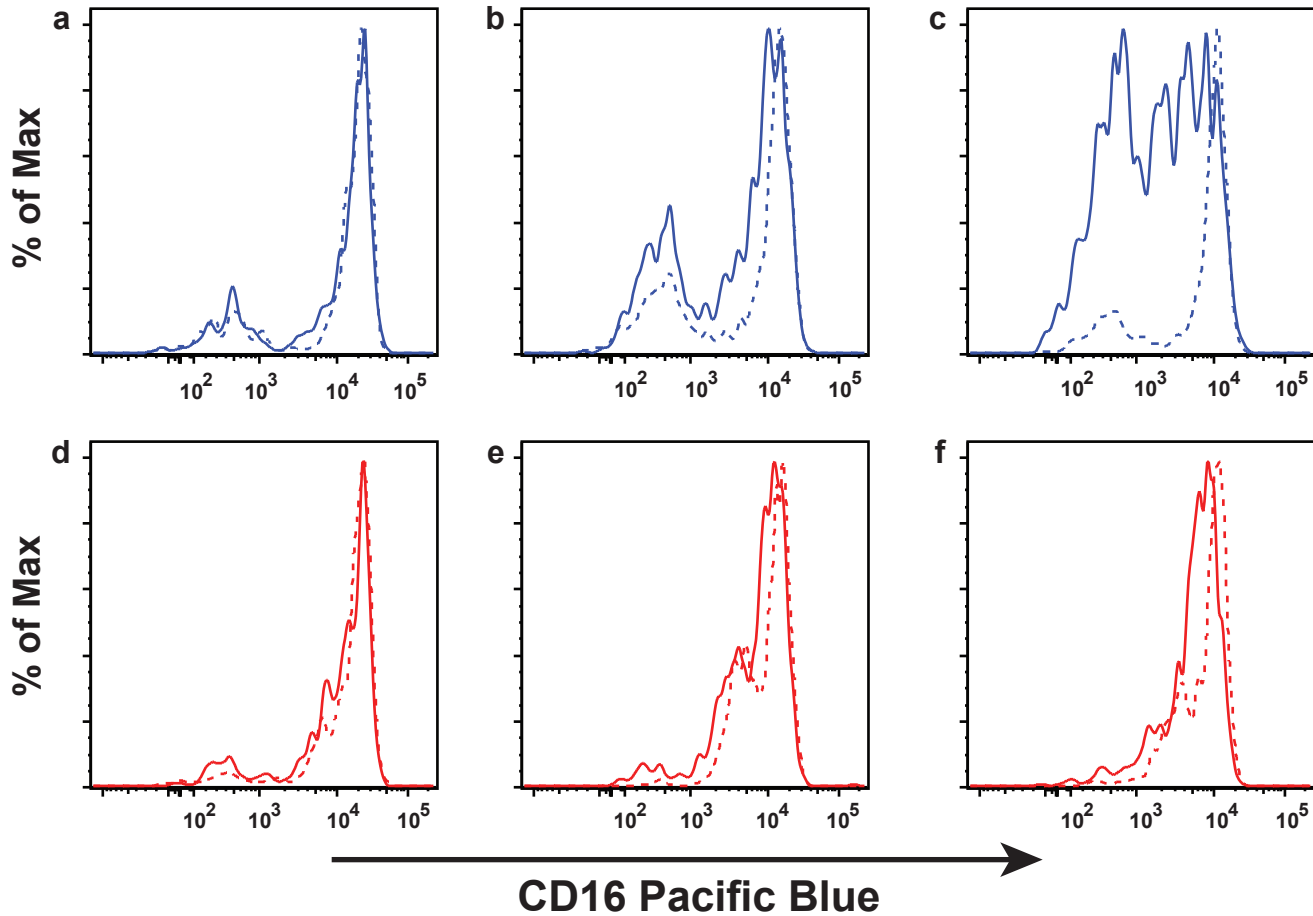

Supplement: NIHMS866639-supplement-SFigure_4.pdf [file NIHMS866639-supplement-SFigure_4.pdf]

**a**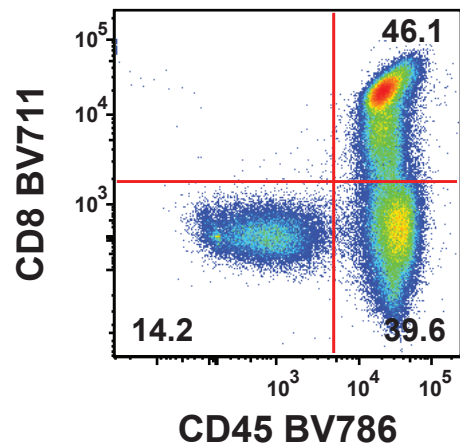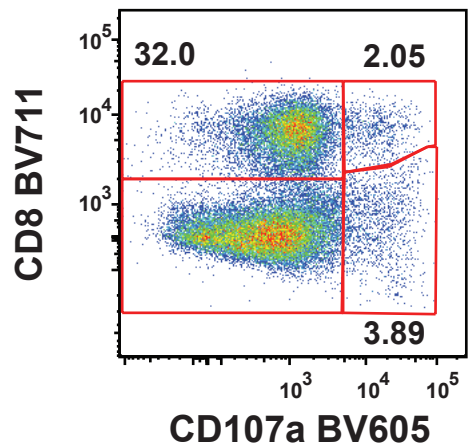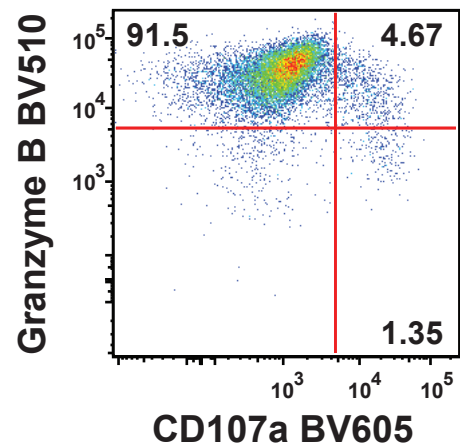**b**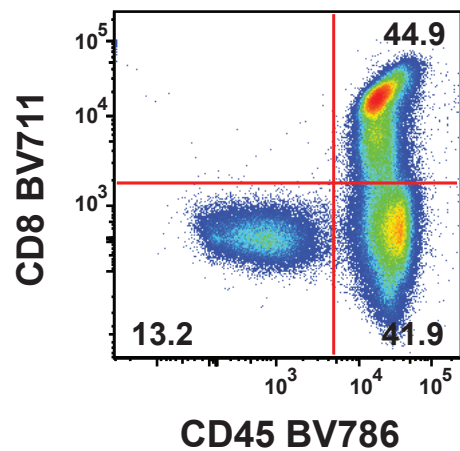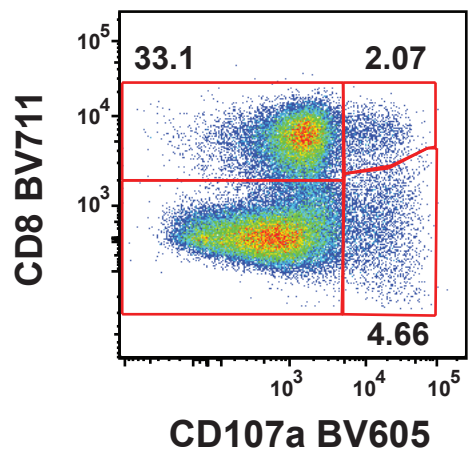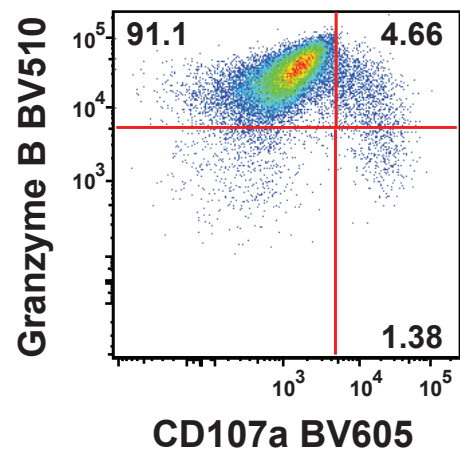

Supplement: NIHMS866639-supplement-SFigure_5.pdf [file NIHMS866639-supplement-SFigure_5.pdf]

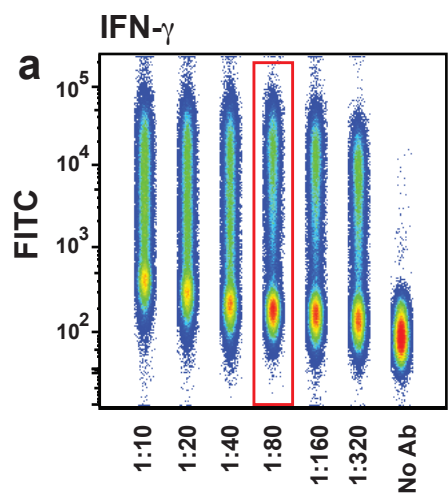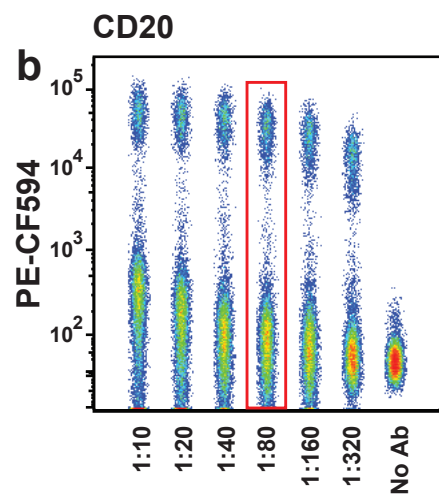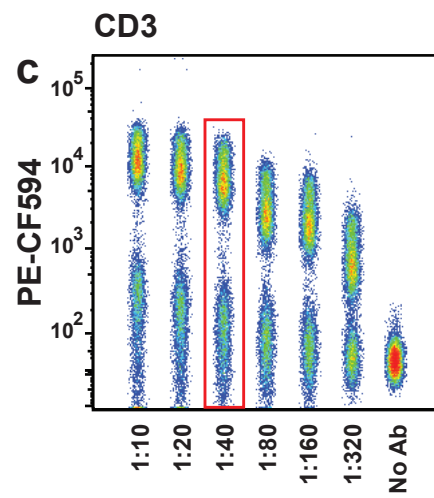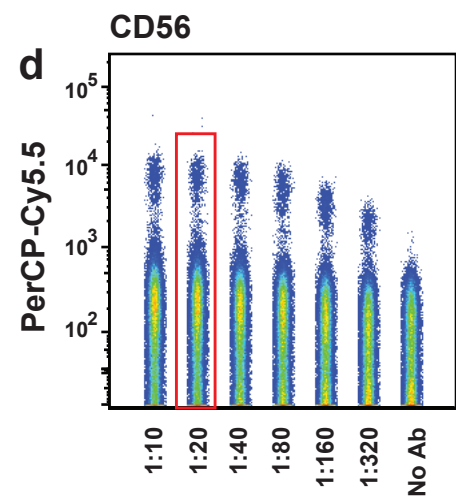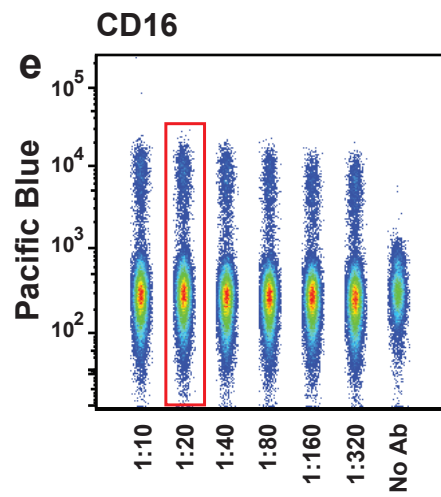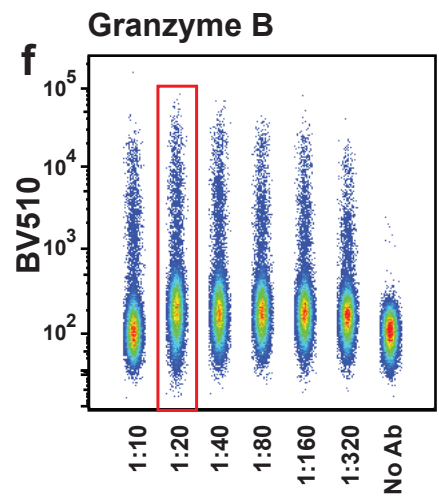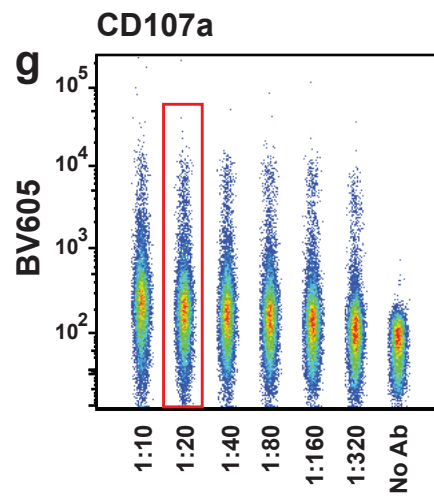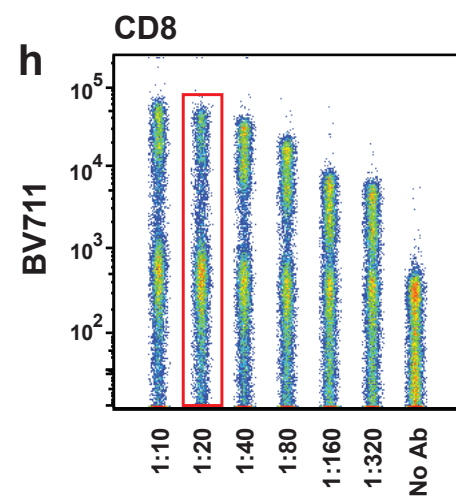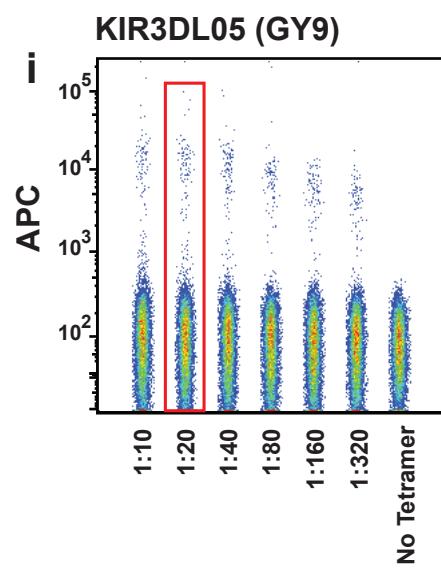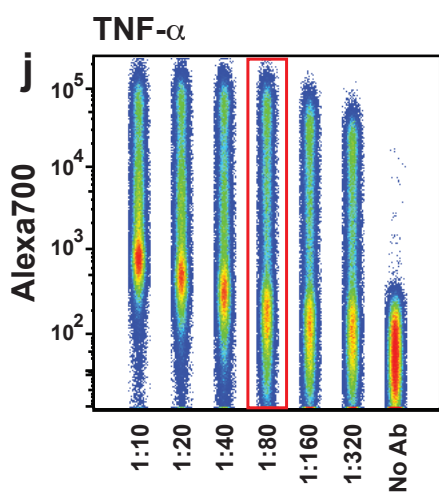

Supplement: NIHMS866639-supplement-SFigure_6.pdf [file NIHMS866639-supplement-SFigure_6.pdf]

**a**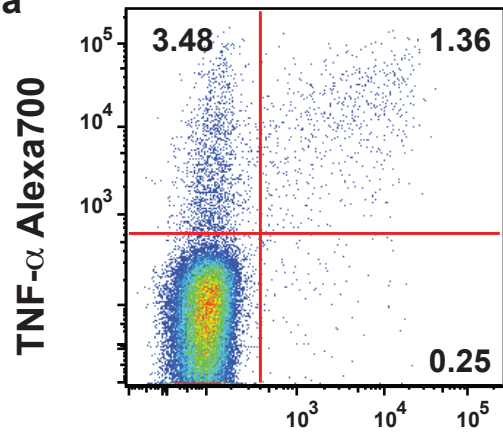**b**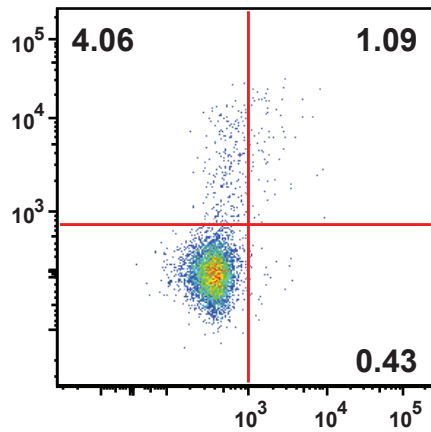**c**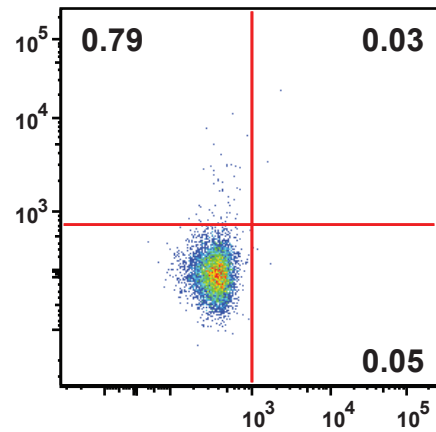**IFN- $\gamma$  FITC**

Supplement: NIHMS866639-supplement-SFigure_7.pdf [file NIHMS866639-supplement-SFigure_7.pdf]

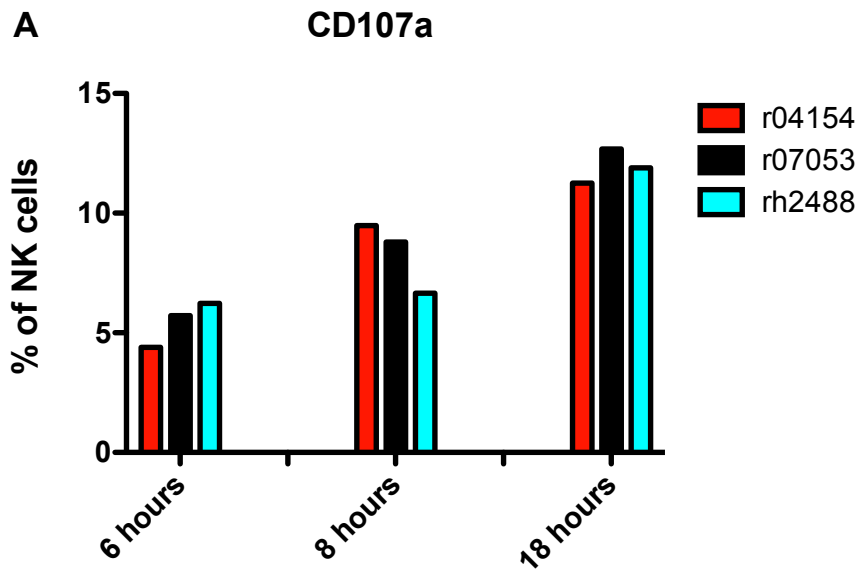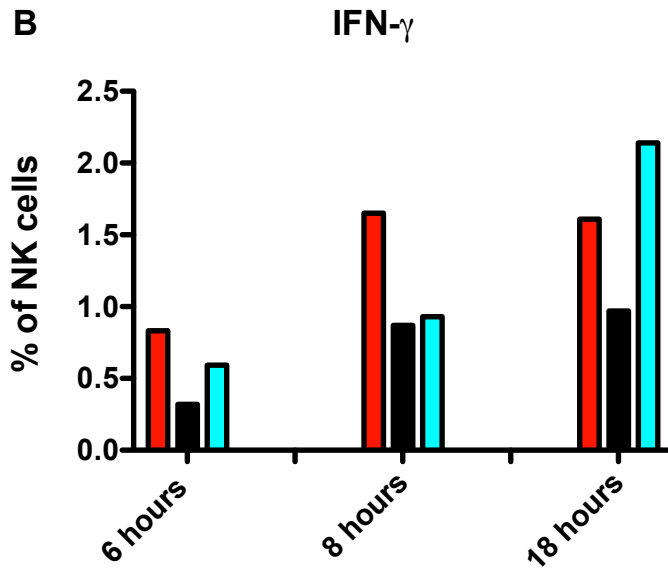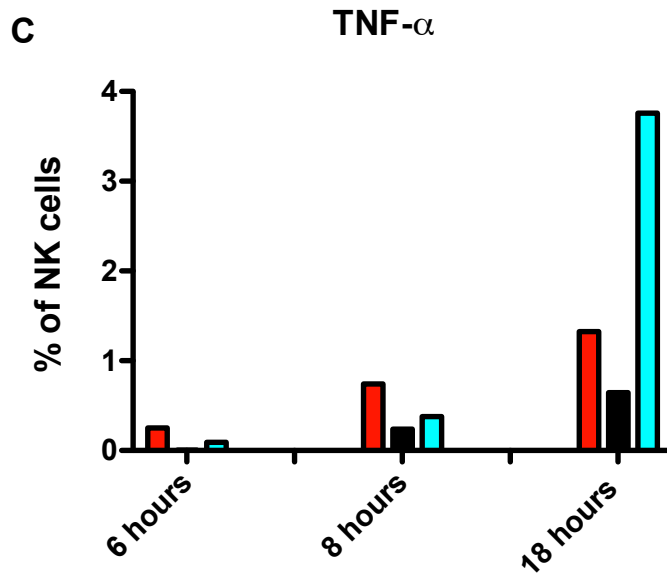

Supplement: NIHMS866639-supplement-SFigure_8.pdf [file NIHMS866639-supplement-SFigure_8.pdf]
